# Supplementary material for: Identification of protease substrates by combinatorial profiling on TentaGel beads
Source: Royal Society of Chemistry journal article supplement (doi:10.1039/b713595e), 2007-01-01

## Electronic Supplementary Information

### Identification of protease substrates by combinatorial profiling on tentagel beads

Jacob Kofoed<sup>‡a</sup> and Jean-Louis Reymond<sup>\*a</sup>

<sup>a</sup> Department of Chemistry and Biochemistry, University of Berne, Freiestrasse 3, CH-3012 Berne, Switzerland. Fax: +41 31 631 80 57; Tel: +41 31 631 43 25; E-mail: jean-louis.reymond@ioc.unibe.ch; Website: <http://www.dcb.unibe.ch/groups/reymond>.

<sup>‡</sup> Present adress: Diabetes Protein and Peptide Chemistry, Novo Nordisk A/S, Novo Nordisk Park, DK-2760 Måløv, Denmark.

#### Experimental section

**General.** Reagents were purchased in the highest quality available from Fluka, Sigma, Bachem, Novabiochem, NeoMPS or Aldrich. All solvents used in reactions were bought in *p.a.* quality or distilled and dried prior to use. Solvents for extractions were distilled from technical quality. Sensitive reactions were carried out under nitrogen or argon, the glassware being heated under high vacuum. Preparative RP-HPLC (flow rate 100 mL min<sup>-1</sup>) was performed with a Waters Delta Prep 4000 system with a Waters Prepak Cartridge (500 g) as column and Waters 486 Tunable Absorbance Detector. Semi-preparative RP-HPLC (flow rate 4 mL min<sup>-1</sup>) was performed with a Water 510 Pump operated with a Waters Automated Gradient Controller and Jasco UV-2075 Plus Detector on a Vydac 218 TP (1.0 cm × 25 cm) column. Analytical RP-HPLC (flow rate 4 mL min<sup>-1</sup>) was performed on Waters 600E systems with Waters Atlantis (4.6 mm × 100 mm, dC18, 5 mm) column, UV detection with Waters 996 photodiode array detector). Data recording and processing was done with Waters Empower2 software. Eluents for all systems were: A: water and 0.1% TFA; D: acetonitrile, water and TFA (3/2/0.1%). Analytes were quantified using external standards. MS and HRMS analyses were provided by the mass spectrometry service of the Department of Chemistry and Biochemistry, University of Berne. <sup>1</sup>H and <sup>13</sup>C NMR spectra were recorded on

Bruker AC 300 (300 MHz) and DRX 500 or Avance 500 (500 MHz) instruments. Chemical shifts ( $\delta$ ) are given in ppm referring to solvent residual peak, coupling constants ( $J$ ) in Hertz (Hz). Solid phase peptide chemistry was performed in polypropylene syringes fitted with a polyethylene frit and a teflon stopcock and stopper.

**Coupling of the Fmoc-protected amino acids.** The resin was washed and swollen inside the reactor with DCM ( $2 \times 5$  mL) and DMF ( $1 \times 5$  mL). The appropriate resin (library: TentaGel HL ( $0.65 \text{ mmol g}^{-1}$ ), single sequences: resin was acylated with 2.5 equivalents of *N*-Fmoc amino acid in the presence of 2.5 equivalents of DIPCDI and 2.5 equivalents of HOBT in DMF. After 1 hr the resin was washed ( $3 \times$  each) with DMF, DCM, and MeOH, and controlled with the TNBS (trinitrobenzenesulfonic acid) or chloranil test followed by acetylation.

**Cleavage of the Fmoc protecting group.** The Fmoc protecting group was removed with 5 mL of a solution of DMF-piperidine (4:1, *v/v*) for 10 min. After filtration, the procedure was repeated and then washed ( $3 \times$  each) with DMF, DCM and MeOH.

***N*-Acetylation.** The resin was acetylated with a solution of acetic acid anhydride-DCM (1:1, *v/v*) for 10 min. After filtration, the procedure was repeated and then washed ( $3 \times$  each) with DMF, DCM and MeOH.

**TFA cleavage.** The cleavage was carried out using TFA-H<sub>2</sub>O-TIS (triisopropylsilane) as a (95:2.5:2.5, *v/v*) solution for 6 hrs.

**Resin mixing and splitting.** The resin was suspended in DMF-DCM (2:1, *v/v*), and mixed *via* nitrogen bubbling for 15 min, and then distributed in four equal portions.

**4-Carboxybenzaldehyde 2-{ethyl-[4-(4{nitrophenylazo)phenyl]-amino}ethyl ester (3).** A solution of 4-carboxybenzaldehyde (**1**) (100 mg, 0.67 mmol), Disperse Red 1 (**2**) (210 mg, 0.67 mmol) and DMAP (81 mg, 0.67 mmol) in DCM was cooled in an ice-bath before EDC (141 mg, 0.74 mmol) was added. The reaction was allowed to heat up to rt overnight. The reaction mixture was extracted with brine and evaporated to dryness. The red residue was flash chromatographed (n-hexane-ethyl acetate (2:1, *v/v*)) to yield **3** as a red waxy solid (30 mg, 10%).  $R_f = 0.21$  (n-hexane-ethyl acetate (2:1, *v/v*)). IR (neat)  $\tilde{\nu} = 2973, 1718, 1703, 1596, 1585, 1512, 1382, 1333, 1310, 1266, 1198, 1131, 1100, 1071, 1015, 856, 824, 756 \text{ cm}^{-1}$ . <sup>1</sup>H NMR (300 MHz, CDCl<sub>3</sub>)  $\delta = 10.01$  (s, 1H), 8.27 (d, 2H,  $J = 7.16$  Hz), 8.04 (d, 2H,  $J =$

6.60 Hz), 7.76 (m, 6H), 6.81 (d, 2H,  $J = 9.42$  Hz), 4.49 (t, 2H,  $J = 6.62$  Hz), 3.72 (t, 2H,  $J = 6.62$  Hz), 3.51 (q, 2H,  $J = 6.97$  Hz), 1.12 (t, 3H,  $J = 6.97$  Hz) ppm.  $^{13}\text{C}$  NMR (300 MHz,  $\text{CDCl}_3$ )  $\delta$  = 191.4, 169.9, 155.9, 153.5, 150.7, 142.9, 141.9, 135.0, 130.3, 129.6, 124.7, 122.6, 111.6, 62.4, 58.5, 42.3, 12.4 ppm. ESI MS(+): calcd for  $\text{C}_{24}\text{H}_{24}\text{N}_4\text{O}_5^+$  447.17, found 447.19.

**On-bead proteolytic assays.** 50 mg library resin was swollen overnight in 100 mM bis-tris buffer at the indicated pH (see below). The swelling solution was removed by filtration. 1 mL of a solution of the protease of interest (1 mg/ml) in 100 mM bis-tris buffer was added and resin was shaken for 18 hrs and washed extensively with bis-tris buffer, DMSO, DMF, MeOH, DCM, MeOH, DMF and finally with bis-tris buffer again (3  $\times$  each). Then 1 mL of 10 mM solution of **3** in THF/ $\text{H}_2\text{O}$ /AcOH (90:5:5, v/v/v) was added and the resin was shaken for 1 hrs. Afterwards  $\text{NaBH}_3\text{CN}$  (6 mg, 0.09 mmol) was added and the resin was shaken for 1 hrs. The resin was washed extensively with bis-tris buffer, DMSO, DMF, MeOH, DCM, MeOH, DMF and finally with bis-tris buffer again (3  $\times$  each) and a suspension of the resin in DMF was transferred to a silica gel plate and the beads were observed under a microscope. Single red colored beads were transferred via a syringe needle to amino acid analysis vials. The following commercial enzymes were used: Trypsin from pig pancreas 1645  $\text{U mg}^{-1}$  (Fluka 82495); Subtilisin from *Bacillus licheniformis* 10.5  $\text{U mg}^{-1}$  (Fluka 85968);  $\alpha$ -Chymotrypsin from bovine pancreas 74.6  $\text{U mg}^{-1}$  (Fluka 27270); Pepsin from porcine stomach mocusa 4500  $\text{U mg}^{-1}$  (SIGMA p-6887).

**Peptide Synthesis.** The peptides were re-synthesized on Rink amide NovaGel<sup>TM</sup> (high-loading PEG-PS resin 0.63 mmol  $\text{g}^{-1}$ ) using the same coupling conditions as described for the linear library synthesis. After TFA cleavage the peptides were precipitated with methyl *tert*-butyl ether and dissolved in water-acetonitrile mixture.

**Solution phase proteolytic cleavage.** Peptides **10-17** were conditioned as 2 mM stock solutions in water. The proteolysis was started by adding 5  $\mu\text{L}$  of a freshly prepared 1 mg  $\text{mL}^{-1}$  stock solution<sup>2</sup> of the protease in 100 mM bis-tris buffer to a mixture of 50  $\mu\text{L}$  peptide stock solution and 45  $\mu\text{L}$  100 mM bis-tris buffer. The assay concentration under these conditions was 1 mM for the peptide substrate and 50  $\mu\text{g mL}^{-1}$  for the protease. The following pH were used: Trypsin: pH 8, Subtilisin: pH 6.5,  $\alpha$ -Chymotrypsin: pH 8, Pepsin: pH 4. The reactions were analyzed by RP-HPLC. Flow rate: 3.0  $\text{mL min}^{-1}$ , 100% A, 0%D to 100% D, 0% 0 in 15

min. The crude proteolytic mixture was also subjected to ESI MS(+) analysis. The peptide fragments were identified using a computer generated database of possible mass fragments. For the Meprin-alpha the provided stock solution was diluted appropriately.

**Bead analysis.** The beads were transferred *via* a sterile syringe needle to amino acid analysis vial and hydrolyzed with aqueous HCl (6 M) at 110°C for 22 hrs. Quantitative AAA was performed by HPLC after derivatization with phenyl isothiocyanate. The detection limit for such analysis is usually 50 pmoles. We used tentagel beads of 90 micrometer diameter with 0.63 mmol/g loading. Sequences were assigned from AAA using the TAGSFREE program available from the author's website (<http://www.dcb.unibe.ch/groups/reymond/>). The user provides an input file <name>.csv describing the library as follows: Each line lists a different amino acid (in 3 letter code) followed by the usage vector as a series of 1's and 0's for each position up to the planned number of variable positions all separated by semicolons. The program handles "unique pair" designs or any other design. An excel file listing unique pairs is provided as a help for library design. Running the TAGSFREE program on the input file <name>.csv generates an output file <name>LIB.txt in which all possible AAA and the corresponding sequences are listed in the order of AAA and an output file <name>STAT.txt which contains the analysis of the generated library. The AAA of any bead is written in form of a series of integers (0, 1, 2) indicating the relative amounts of each building block in the order used in the input file. Decoding is carried out by typing an AAA in the search window of a text editor capable of handling the large library file. The search function automatically goes to the line(s) containing the AAA, which shows the corresponding sequence(s).

**Ac-Pro-Asp-Gly-Leu-Arg-Ile-Val-Asp-Bla-NH<sub>2</sub> (4).** From NovaGel<sup>TM</sup> (160 mg, 0.63 mmol g<sup>-1</sup>), **4** was obtained as colorless foamy solid after preparative HPLC purification (35 mg, 31%, as TFA-salt); anal. RP-HPLC (80% A, 20% D to 20% A, 80% D in 15 min): *t<sub>R</sub>* = 6.68 min; ESI MS(+): calcd for C<sub>43</sub>H<sub>73</sub>N<sub>13</sub>O<sub>14</sub>: 995.54, found: 995.50.

Amino acid analysis of the bead corresponding to peptide **4**

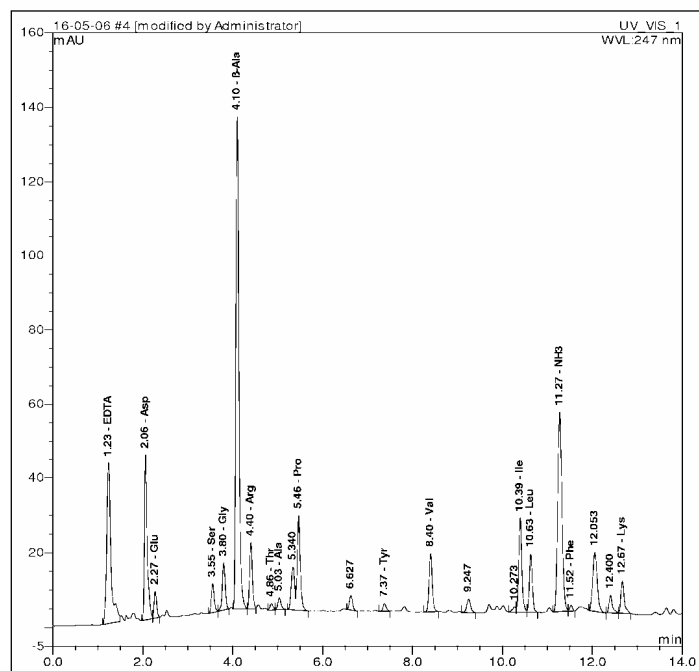

| RT min        | RT (STD) min | PW(50%) min | Area mAU*min  | Height mAU     | Amount pmol    | Peak Name |
|---------------|--------------|-------------|---------------|----------------|----------------|-----------|
| 1.23          | 1.22         | 0.085       | 4.67          | 43.07          | 462.1          | EDTA      |
| 2.06          | 2.06         | 0.059       | 3.19          | 44.28          | 197.0          | Asp       |
| 2.27          | 2.27         | 0.062       | 0.47          | 7.10           | 33.8           | Glu       |
| 3.55          | 3.55         | 0.068       | 0.57          | 7.76           | 40.6           | Ser       |
| 3.80          | 3.79         | 0.068       | 0.96          | 12.55          | 65.6           | Gly       |
| 4.10          | 4.09         | 0.070       | 10.32         | 132.38         | 715.9          | β-Ala     |
| 4.40          | 4.40         | 0.065       | 1.25          | 17.62          | 88.9           | Arg       |
| 4.86          | 4.85         | 0.074       | 0.14          | 1.74           | 10.3           | Thr       |
| 5.03          | 5.03         | 0.073       | 0.26          | 3.16           | 15.7           | Ala       |
| 5.46          | 5.46         | 0.071       | 2.05          | 25.34          | 108.9          | Pro       |
| 7.37          | 7.36         | 0.074       | 0.17          | 2.04           | 9.9            | Tyr       |
| 8.40          | 8.39         | 0.073       | 1.27          | 15.53          | 74.0           | Val       |
| 10.39         | 10.38        | 0.072       | 2.04          | 25.13          | 119.1          | Ile       |
| 10.63         | 10.62        | 0.071       | 1.20          | 15.56          | 76.7           | Leu       |
| 11.27         | 11.27        | 0.100       | 5.83          | 53.62          | 859.4          | NH3       |
| 11.52         | 11.52        | 0.066       | 0.11          | 1.53           | 7.8            | Phe       |
| 12.67         | 12.67        | 0.076       | 0.76          | 8.58           | 24.1           | Lys       |
| <b>Total:</b> |              |             | <b>35,249</b> | <b>416,977</b> | <b>2909.60</b> |           |

ESI-MS(+) and analytical HPLC of peptide 4

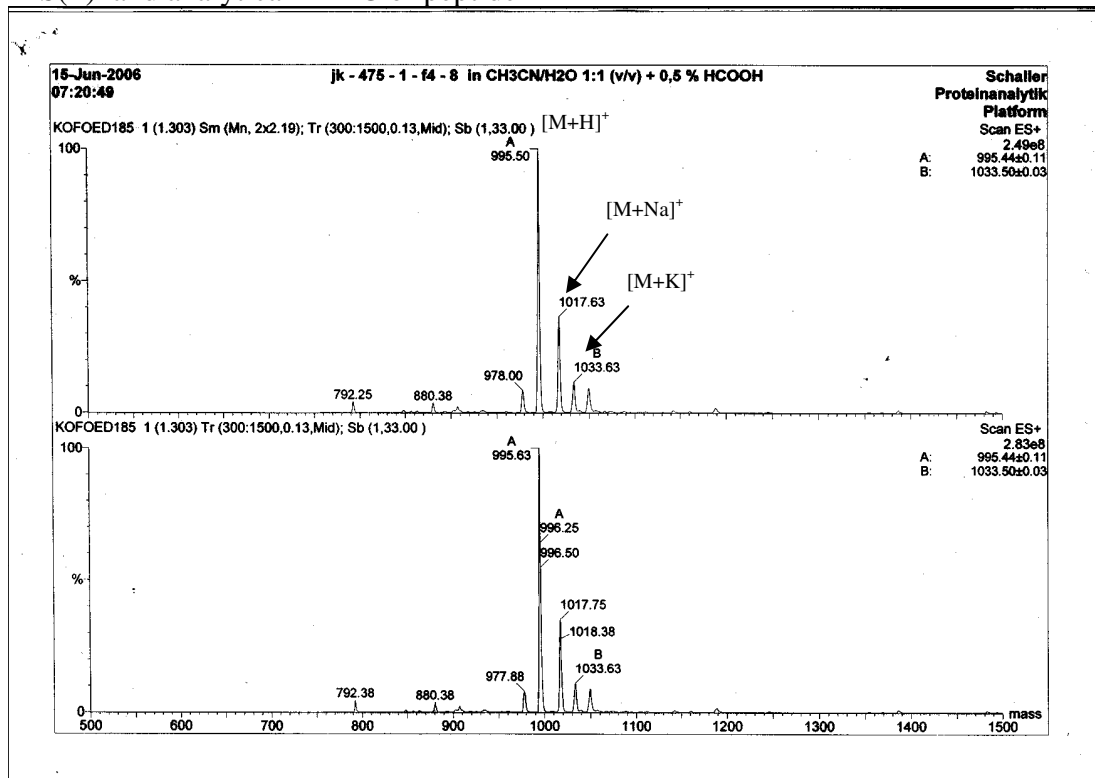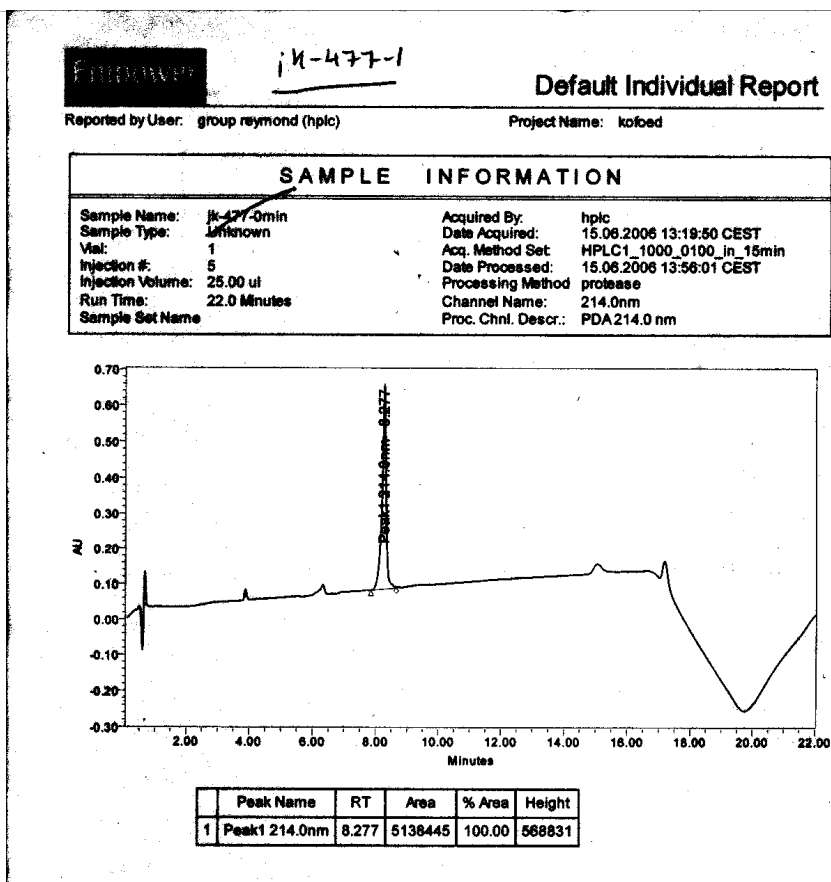

ESI MS(+) and HPLC of proteolytic digest of peptide 4 with trypsin

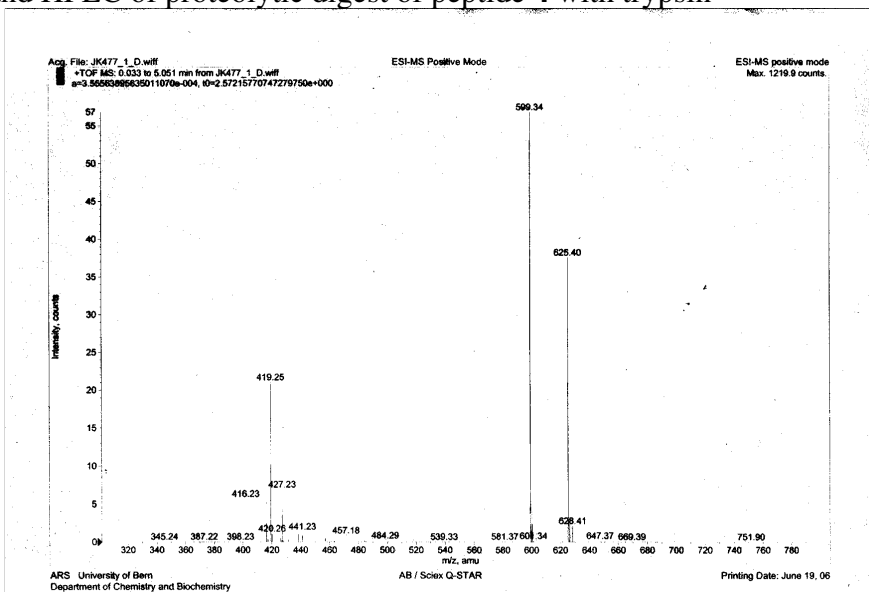

Default Individual Report

Reported by User: group reymond (hplc)

Project Name: kolod

SAMPLE INFORMATION

|                   |              |                     |                          |
|-------------------|--------------|---------------------|--------------------------|
| Sample Name:      | jk-477-80min | Acquired By:        | hplc                     |
| Sample Type:      | Unknown      | Date Acquired:      | 15.06.2006 14:50:35 CEST |
| Vial:             | 1            | Acq. Method Set:    | HPLC1_1000_0100_in_15min |
| Injection #:      | 9            | Date Processed:     | 15.06.2006 15:15:06 CEST |
| Injection Volume: | 25.00 ul     | Processing Method:  | protease                 |
| Run Time:         | 22.0 Minutes | Channel Name:       | 214.0nm                  |
| Sample Set Name:  |              | Proc. Chnl. Descr.: | PDA214.0 nm              |

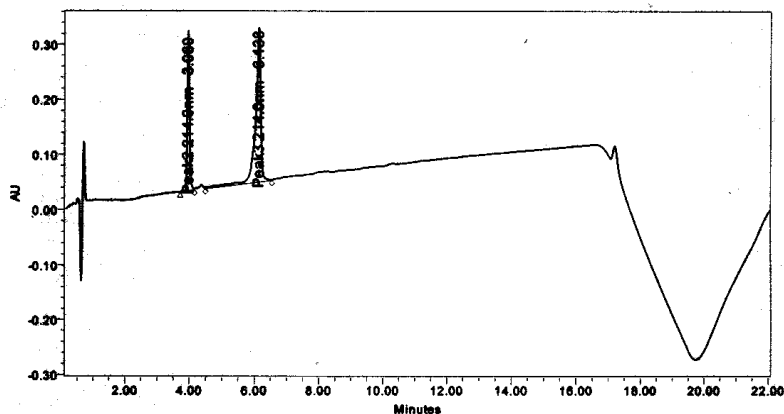

| Peak Name       | RT    | Area    | % Area | Height |
|-----------------|-------|---------|--------|--------|
| 1 Peak2 214.0nm | 3.960 | 1401012 | 31.36  | 288250 |
| 2 Peak3 214.0nm | 6.138 | 3067092 | 68.64  | 278774 |
| 3 Peak4 214.0nm | 8.457 |         |        |        |

|                    |                      |                       |                          |                                   |
|--------------------|----------------------|-----------------------|--------------------------|-----------------------------------|
| 76.03992 G         | 191.06686 DG         | 345.22509 GLR         | 557.37756 GLRIV          | 787.43144 DGLRIVD                 |
| 89.07157 B (AMID)  | 204.09851 DB (AMID)  | 346.19787 IVD         | 572.35209 RIVDB (AMID)   | 811.46786 P (ACET)DGLRIV          |
| 118.08687 V        | 231.17093 IV         | 387.27204 RIV         | 573.33609 DGLRI          | 857.48455 DGLRIVDB (AMID)         |
| 132.10252 I        | 233.11381 VD         | 401.28769 LRI         | 599.31539 P (ACET)DGLR   | 926.49480 P (ACET)DGLRIVD         |
| 132.10252 L        | 273.10876 P (ACET)D  | 416.25098 IVDB (AMID) | 615.38304 LRIVD          | 996.54791 P (ACET)DGLRIVDB (AMID) |
| 134.04540 D        | 288.20363 LR         | 443.21428 P (ACET)DGL | 672.40450 DGLRIV         |                                   |
| 134.04540 D        | 288.20363 RI         | 458.30915 GLRI        | 672.40450 GLRIVD         |                                   |
| 158.08182 P (ACET) | 303.16692 VDB (AMID) | 460.25203 DGLR        | 685.43615 LRIVDB (AMID)  |                                   |
| 175.11957 R        | 304.15092 DGL        | 500.35610 LRIV        | 712.39945 P (ACET)DGLRI  |                                   |
| 189.12398 GL       | 330.13022 P (ACET)DG | 502.29898 RIVD        | 742.45761 GLRIVDB (AMID) |                                   |

**Ac-Thr-Asp-Gly-Arg-Glu-Met-Val-Leu-Bla-NH<sub>2</sub> (5).** From NovaGel™ (160 mg, 0.63 mmol g<sup>-1</sup>), **5** was obtained as colorless foamy solid after preparative HPLC purification (27 mg, 31%, as TFA-salt); anal. RP-HPLC (80% A, 20% D to 20% A, 80% D in 15 min): *t<sub>R</sub>* = 5.04 min; ESI MS(+): calcd for C<sub>42</sub>H<sub>73</sub>N<sub>13</sub>O<sub>15</sub>S: 1031.51, found: 1031.63.

Amino acid analysis of the bead corresponding to peptide **5**

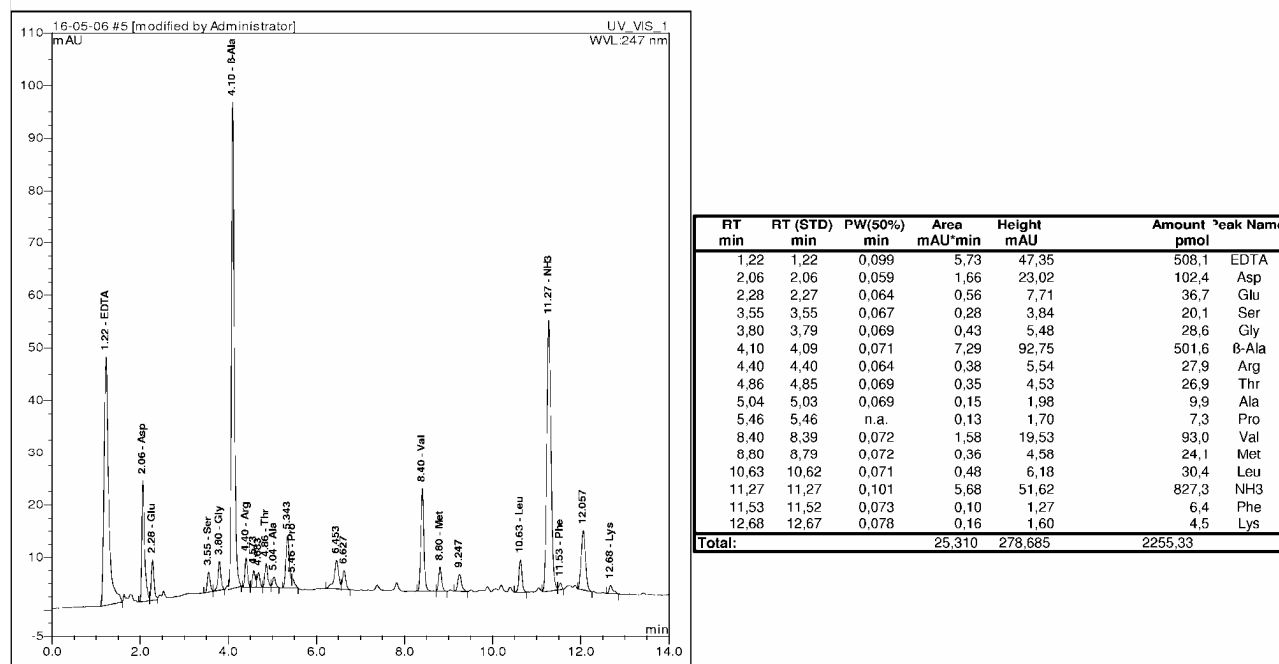



ESI-MS(+) and analytical HPLC of peptide 5

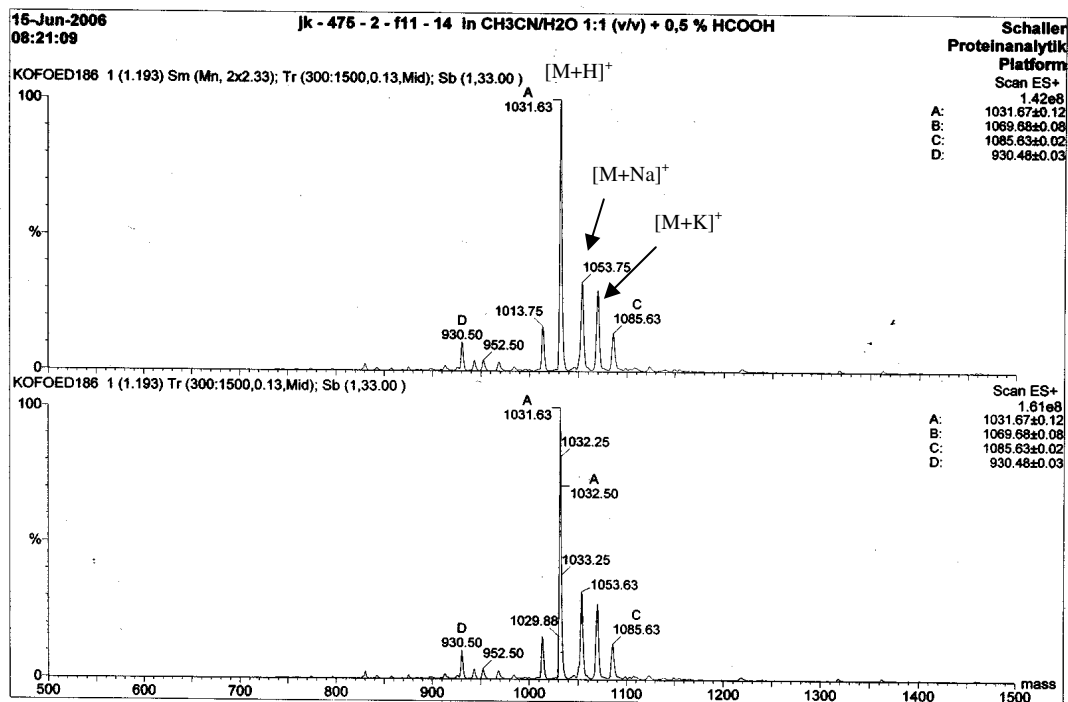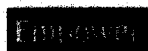

Default Individual Report

Reported by User: group reymond (hplc)

Project Name: kofaed

SAMPLE INFORMATION

|                   |               |                     |                          |
|-------------------|---------------|---------------------|--------------------------|
| Sample Name:      | jk-477-2-0min | Acquired By:        | hplc                     |
| Sample Type:      | Unknown       | Date Acquired:      | 16.06.2006 10:02:22 CEST |
| Vial:             | 1             | Acq. Method Set:    | HPLC1_1000_0100_in_15min |
| Injection #:      | 1             | Date Processed:     | 16.06.2006 10:31:19 CEST |
| Injection Volume: | 25.00 ul      | Processing Method:  | protease                 |
| Run Time:         | 22.0 Minutes  | Channel Name:       | 214.0nm                  |
| Sample Set Name:  |               | Proc. Chnl. Descr.: | PDA.214.0 nm             |

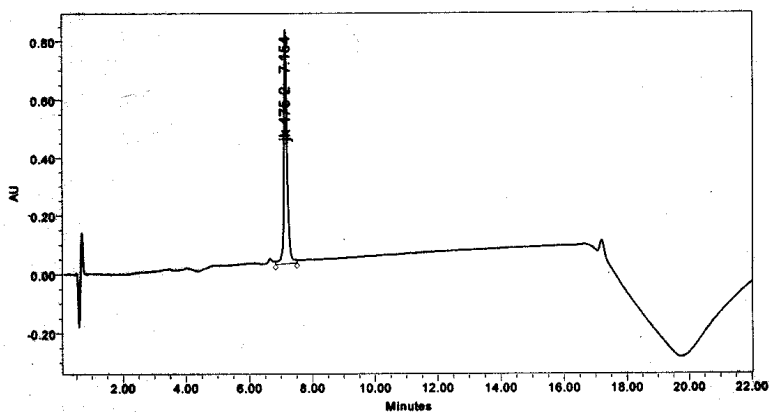

| Peak Name  | RT    | Area    | % Area | Height |
|------------|-------|---------|--------|--------|
| 1 jk-475-2 | 7.154 | 5458358 | 100.00 | 802631 |

ESI MS(+) and HPLC of proteolytic digest of peptide 5 with trypsin

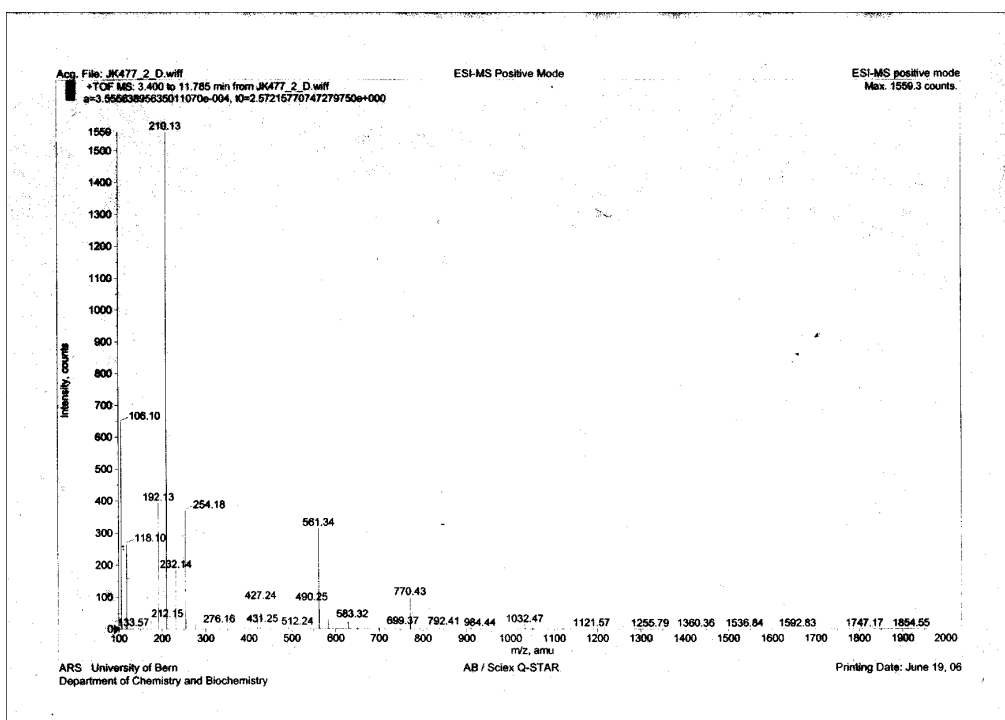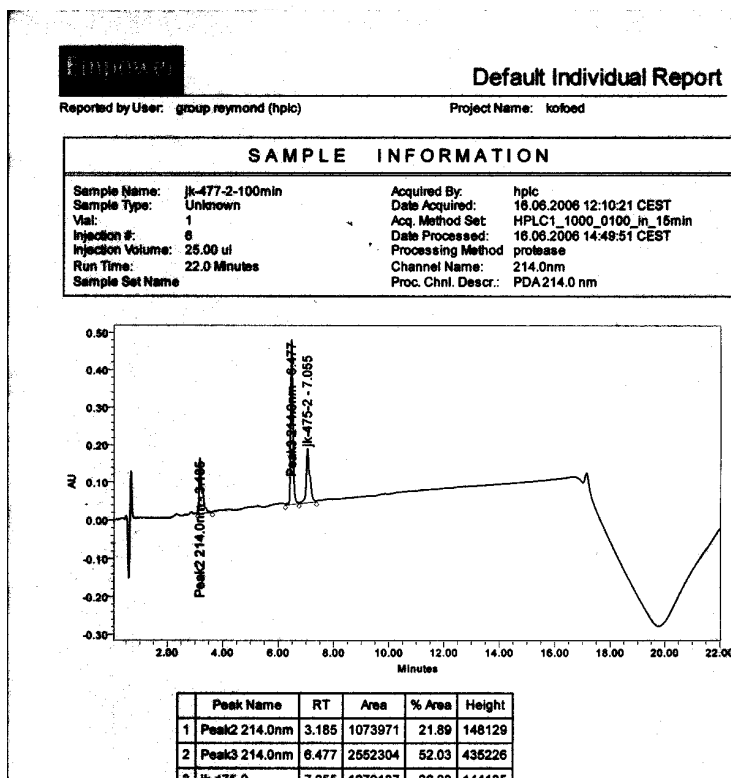

|                    |                       |                        |                          |                                    |
|--------------------|-----------------------|------------------------|--------------------------|------------------------------------|
| 76.03992 G         | 202.15563 LB (AMID)   | 361.18362 GRE          | 561.30712 EMVLB (AMID)   | 819.40352 DGREMLV                  |
| 89.07157 B (AMID)  | 231.17093 VL          | 362.21142 MVL          | 591.29252 GREMV          | 849.37774 T (ACET) DGREMV          |
| 118.08687 V        | 232.14103 GR          | 378.16995 EMV          | 607.25105 DGREM          | 889.45663 DGREMLB (AMID)           |
| 132.10252 L        | 249.12736 MV          | 432.26453 MVLB (AMID)  | 619.26884 T (ACET) DGRE  | 962.46180 T (ACET) DGREMLV         |
| 134.04540 D        | 277.10368 T (ACET) D  | 435.20265 REM          | 647.35512 REMVL          | 1032.51491 T (ACET) DGREMLB (AMID) |
| 148.06105 E        | 279.10154 EM          | 476.21056 DGRE         | 704.37658 GREMLV         |                                    |
| 150.05895 M        | 301.22404 VLB (AMID)  | 490.22625 T (ACET) DGR | 706.31946 DGREMV         |                                    |
| 162.07674 T (ACET) | 304.16216 RE          | 491.25401 EMVL         | 717.40823 REMVLB (AMID)  |                                    |
| 175.11957 R        | 334.12514 T (ACET) DG | 492.22411 GREM         | 750.30933 T (ACET) DGREM |                                    |
| 191.06686 DG       | 347.16797 DGR         | 534.27106 REMV         | 774.42969 GREMLB (AMID)  |                                    |

**Ac-His-Asp-Glu-Ser-Glu-Ile-Tyr-Gly-Bla-NH<sub>2</sub> (6).** From NovaGel<sup>TM</sup> (160 mg, 0.63 mmol g<sup>-1</sup>), **6** was obtained as colorless foamy solid after preparative HPLC purification (51 mg, 43%, as TFA-salt); anal. RP-HPLC (80% A, 20% D to 20% A, 80% D in 15 min): *t<sub>R</sub>* = 2.90 min; ESI MS(+): calcd for C<sub>45</sub>H<sub>64</sub>N<sub>12</sub>O<sub>18</sub>: 1060.45, found: 1060.50.

Amino acid analysis of the bead corresponding to peptide **6**

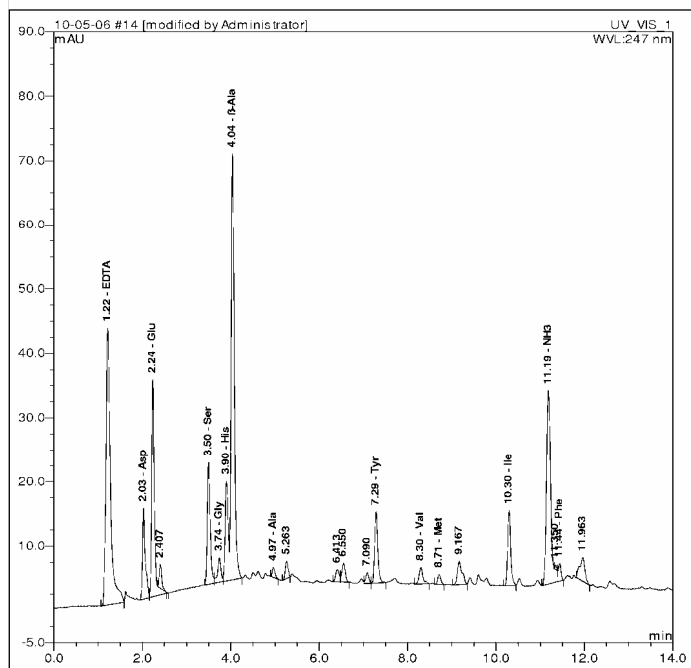

| RT min        | RT (STD) min | PW(50%) min | Area mAU*min  | Height mAU     | Amount pmol    | Peak Name |
|---------------|--------------|-------------|---------------|----------------|----------------|-----------|
| 1,22          | 1,22         | 0,096       | 5,14          | 43,08          | 349,8          | EDTA      |
| 2,03          | 2,03         | 0,060       | 1,06          | 14,13          | 57,8           | Asp       |
| 2,24          | 2,24         | 0,063       | 2,51          | 33,81          | 151,5          | Glu       |
| 3,50          | 3,50         | 0,069       | 1,45          | 18,94          | 93,0           | Ser       |
| 3,74          | 3,74         | 0,070       | 0,33          | 3,82           | 19,2           | Gly       |
| 3,90          | 3,90         | 0,076       | 1,19          | 15,51          | 79,5           | His       |
| 4,04          | 4,04         | 0,074       | 5,50          | 66,33          | 315,0          | β-Ala     |
| 4,97          | 4,97         | 0,063       | 0,11          | 1,57           | 7,6            | Ala       |
| 7,29          | 7,28         | 0,073       | 0,90          | 11,07          | 52,7           | Tyr       |
| 8,30          | 8,31         | 0,082       | 0,25          | 2,53           | 11,8           | Val       |
| 8,71          | 8,71         | 0,071       | 0,12          | 1,50           | 9,7            | Met       |
| 10,30         | 10,29        | 0,071       | 0,94          | 11,71          | 55,8           | Ile       |
| 11,19         | 11,18        | 0,099       | 3,40          | 30,15          | 354,7          | NH3       |
| 11,44         | 11,42        | n.a.        | 0,20          | 2,73           | 14,5           | Phe       |
| <b>Total:</b> |              |             | <b>23,098</b> | <b>256,888</b> | <b>1572,72</b> |           |

ESI-MS(+) and analytical HPLC of peptide 6

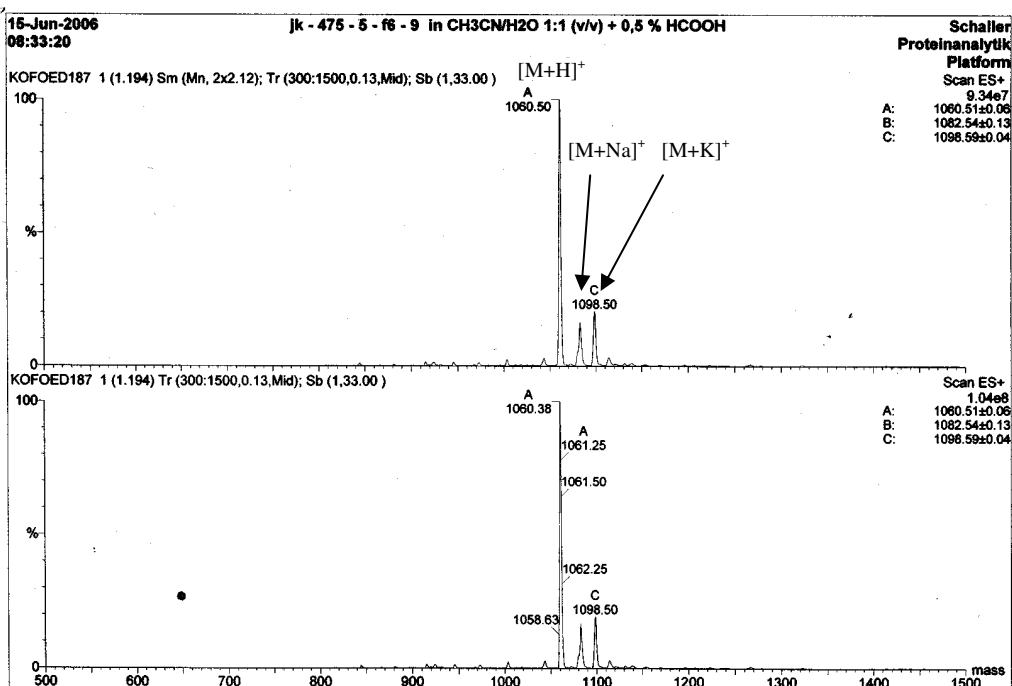

Empower

Default Individual Report

Reported by User: group reymond (hplc)

Project Name: kofaed

SAMPLE INFORMATION

|                   |               |                     |                          |
|-------------------|---------------|---------------------|--------------------------|
| Sample Name:      | jk-475-5-0min | Acquired By:        | hplc                     |
| Sample Type:      | Unknown       | Date Acquired:      | 22.06.2006 12:59:57 CEST |
| Vial:             | 1             | Acq. Method Set:    | HPLC1_1000_0100_in_15min |
| Injection #:      | 5             | Date Processed:     | 22.06.2006 15:03:10 CEST |
| Injection Volume: | 25.00 ul      | Processing Method:  | protease                 |
| Run Time:         | 22.0 Minutes  | Channel Name:       | 214.0nm                  |
| Sample Set Name:  |               | Proc. Chnl. Descr.: | PDA.214.0 nm             |

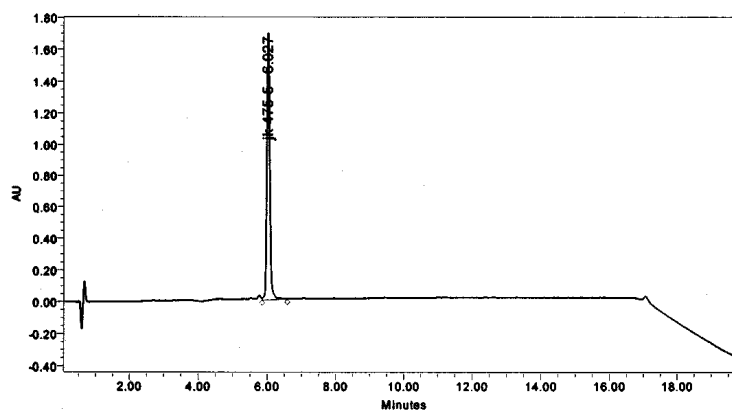

| Peak Name  | RT    | Area    | % Area | Height  |
|------------|-------|---------|--------|---------|
| 1 jk-475-5 | 6.027 | 9864052 | 100.00 | 1694046 |

ESI MS(+) and HPLC of proteolytic digest of peptide 6 with  $\alpha$ -Chymotrypsin

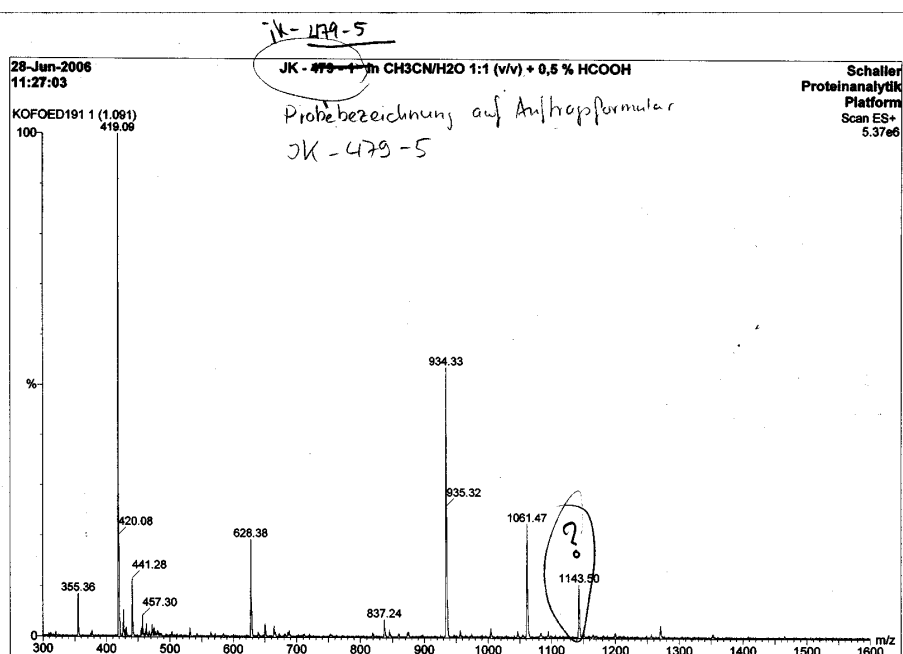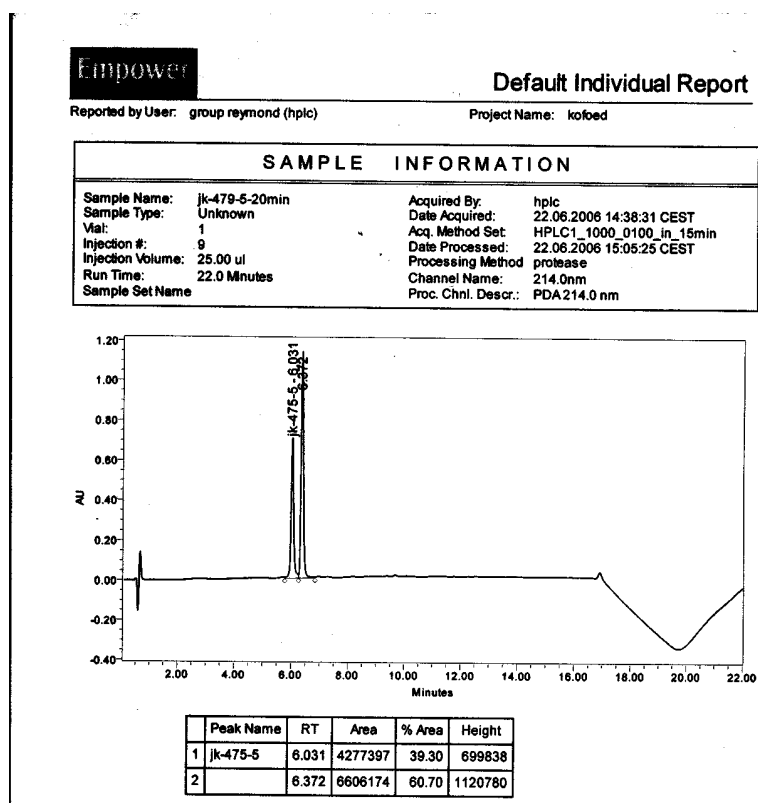

|                     |                      |                       |                         |                                     |
|---------------------|----------------------|-----------------------|-------------------------|-------------------------------------|
| 76.03992 G          | 198.08797 H (ACET)   | 348.17714 SEI         | 481.22990 EIYG          | 697.30452 ESEIYG                    |
| 89.07157 B (AMID)   | 235.09308 ES         | 350.12002 DES         | 511.24047 SEIY          | 755.31000 DESEIY                    |
| 106.05049 S         | 235.09308 SE         | 352.18731 IYG         | 529.18953 H (ACET) DES  | 767.35763 ESEIYGB (AMID)            |
| 132.10252 I         | 239.10325 YG         | 364.13567 ESE         | 551.28301 EIYGB (AMID)  | 771.31618 H (ACET) DESEI            |
| 134.04540 D         | 261.14511 EI         | 422.24042 IYGB (AMID) | 568.26193 SEIYG         | 812.33146 DESEIYG                   |
| 146.09303 GB (AMID) | 263.08799 DE         | 424.20844 EIY         | 592.24667 DESEI         | 882.36457 DESEIYGB (AMID)           |
| 148.06105 E         | 295.16585 IY         | 442.15750 H (ACET) DE | 638.31504 SEIYGB (AMID) | 934.37951 H (ACET) DESEIY           |
| 148.06105 E         | 309.15636 YGB (AMID) | 477.21973 ESEI        | 640.28306 ESEIY         | 991.40097 H (ACET) DESEIYG          |
| 182.08179 Y         | 313.11491 H (ACET) D | 479.16261 DESE        | 658.23212 H (ACET) DESE | 1061.45408 H (ACET) DESEIYGB (AMID) |

**Ac-Thr-Phe-Glu-Arg-Arg-Met-Tyr-Gly-Bla-NH<sub>2</sub> (7).** From NovaGel™ (160 mg, 0.63 mmol g<sup>-1</sup>), **7** was obtained as colorless foamy solid after preparative HPLC purification (31 mg, 22%, as TFA-salt); anal. RP-HPLC (80% A, 20% D to 20% A, 80% D in 15 min): *t<sub>R</sub>* = 4.45 min; ESI MS(+): calcd for C<sub>51</sub>H<sub>78</sub>N<sub>16</sub>O<sub>14</sub>S: 1170.56, found: 1170.63.

Amino acid analysis of the bead corresponding to peptide **7**

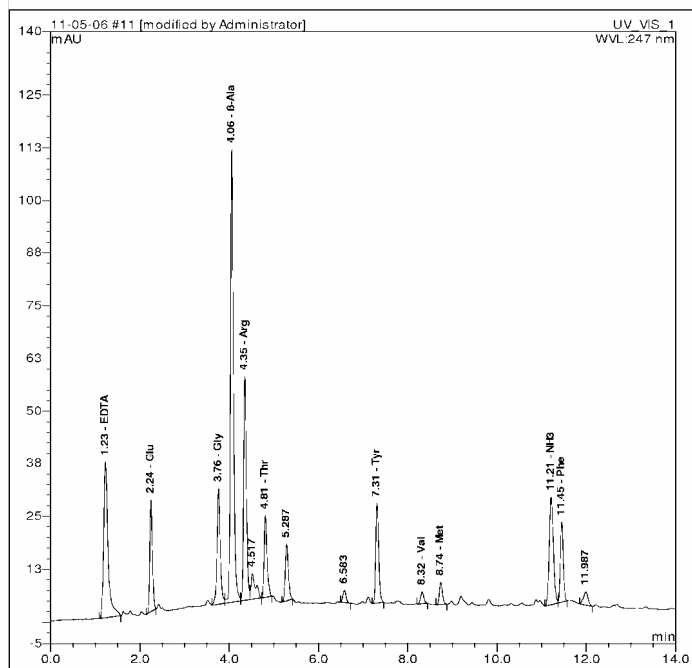

| RT min        | RT (STD) min | PW(50%) min | Area mAU*min | Height mAU | Amount pmol | Peak Name |
|---------------|--------------|-------------|--------------|------------|-------------|-----------|
| 1,23          | 1,22         | 0,091       | 4,13         | 36,82      | 267,0       | EDTA      |
| 2,24          | 2,25         | 0,064       | 1,81         | 26,25      | 134,7       | Glu       |
| 3,76          | 3,76         | 0,071       | 2,25         | 27,23      | 148,7       | Gly       |
| 4,06          | 4,06         | 0,070       | 8,55         | 107,34     | 573,4       | β-Ala     |
| 4,35          | 4,35         | 0,066       | 3,86         | 53,02      | 275,8       | Arg       |
| 4,81          | 4,81         | 0,069       | 1,49         | 19,24      | 116,8       | Thr       |
| 7,31          | 7,31         | 0,069       | 1,78         | 23,44      | 120,7       | Tyr       |
| 8,32          | 8,34         | 0,080       | 0,24         | 2,77       | 13,9        | Val       |
| 8,74          | 8,74         | 0,071       | 0,40         | 5,21       | 31,6        | Met       |
| 11,21         | 11,21        | 0,100       | 2,72         | 25,34      | 336,6       | NH3       |
| 11,45         | 11,44        | 0,071       | 1,43         | 18,92      | 102,7       | Phe       |
| <b>Total:</b> |              |             | 28,669       | 345,563    | 2121,92     |           |

ESI-MS(+) and analytical HPLC of peptide 7

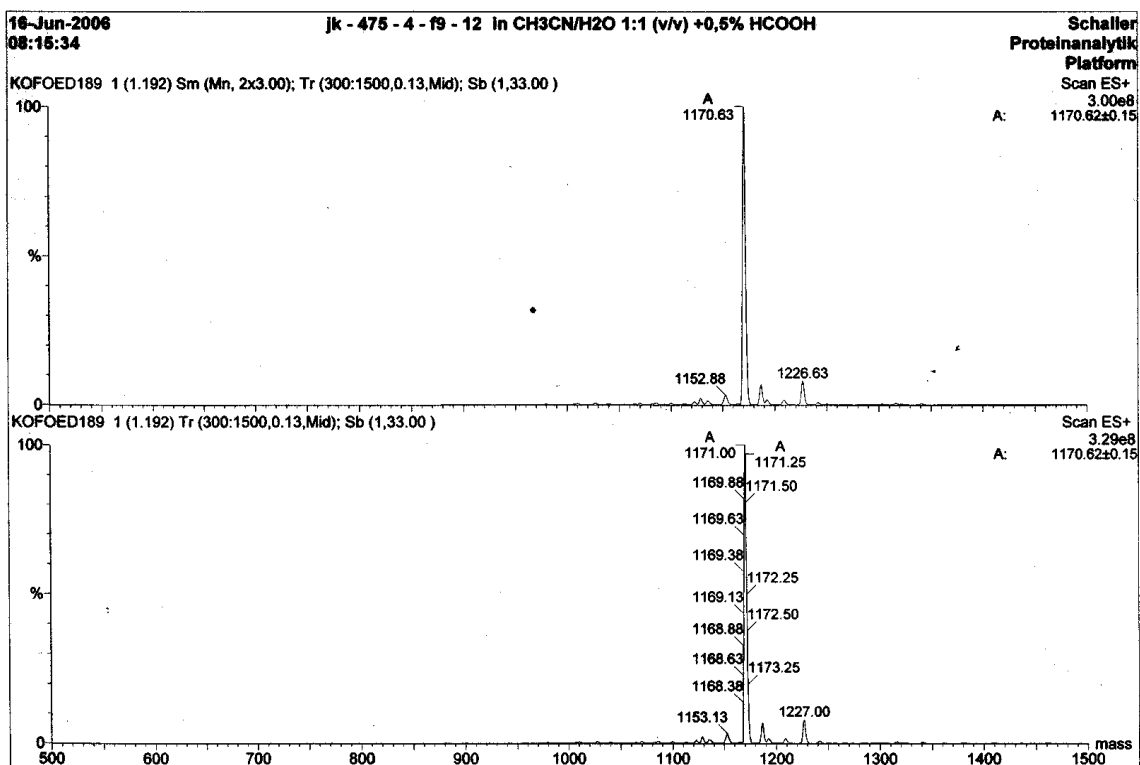

Empower

Default Individual Report

Reported by User: group reymond (hplc)

Project Name: kofaed

SAMPLE INFORMATION

|                   |               |                     |                          |
|-------------------|---------------|---------------------|--------------------------|
| Sample Name:      | jk-478-4-0min | Acquired By:        | hplc                     |
| Sample Type:      | Unknown       | Date Acquired:      | 19.06.2006 13:00:43 CEST |
| Vial:             | 1             | Acq. Method Set:    | HPLC1_1000_0100_in_15min |
| Injection #:      | 9             | Date Processed:     | 19.06.2006 16:16:30 CEST |
| Injection Volume: | 25.00 ul      | Processing Method:  | protease                 |
| Run Time:         | 22.0 Minutes  | Channel Name:       | 214.0nm                  |
| Sample Set Name:  |               | Proc. Chnl. Descr.: | PDA 214.0 nm             |

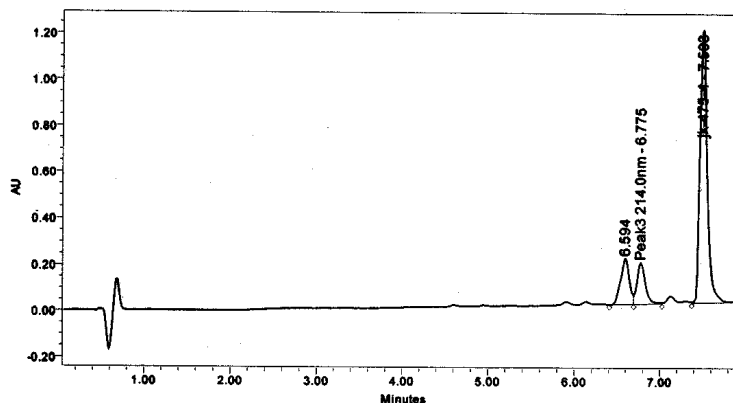

| Peak Name       | RT    | Area | % Area | Height |
|-----------------|-------|------|--------|--------|
| 1 Peak2 214.0nm | 3.195 |      |        |        |
| 2 Peak5 214.0nm | 4.608 |      |        |        |
| 3 Peak6 214.0nm | 4.045 |      |        |        |

ESI MS(+) and HPLC of proteolytic digest of peptide 7 with Subtilisin

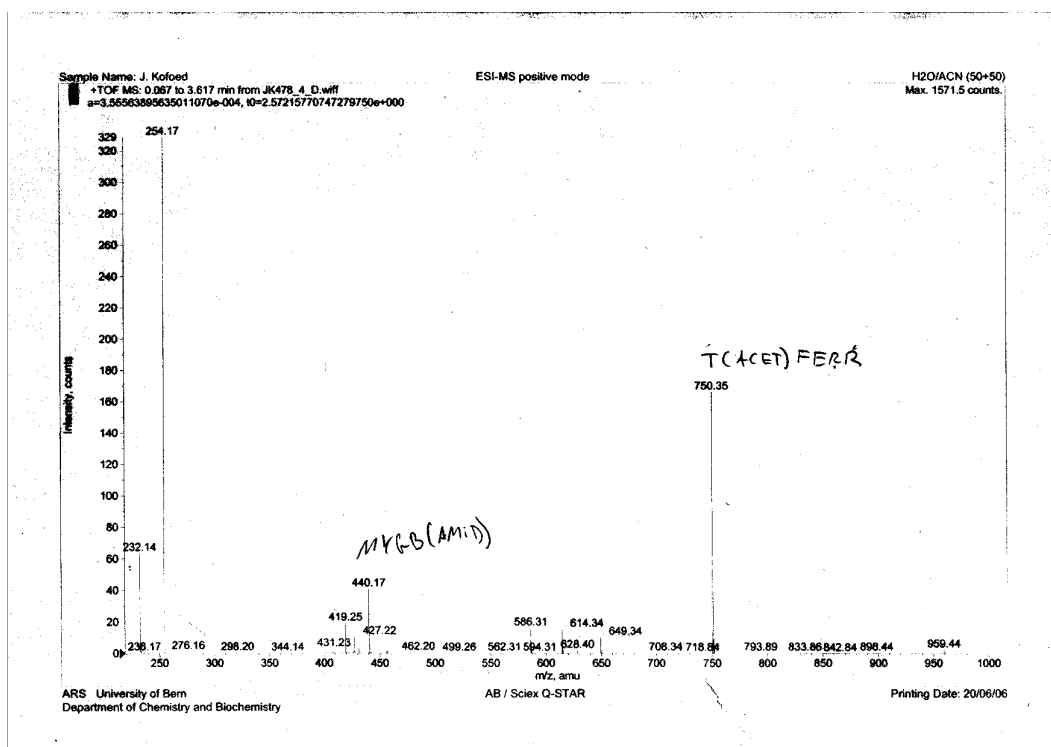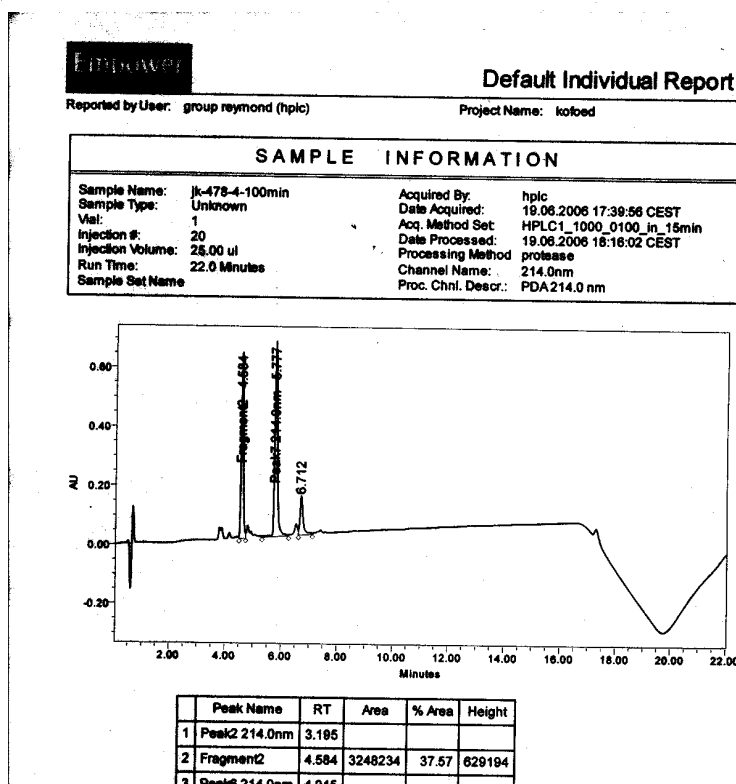

|           |           |           |            |           |             |           |               |            |                          |
|-----------|-----------|-----------|------------|-----------|-------------|-----------|---------------|------------|--------------------------|
| 76.03992  | G         | 182.08179 | Y          | 370.14374 | MYG         | 594.28885 | T (ACET) FER  | 811.38855  | ERRMYG                   |
| 89.07157  | B (AMID)  | 239.10325 | YG         | 438.18774 | T (ACET) FE | 596.29796 | RMVGB (AMID)  | 881.43045  | T (ACET) FERRM           |
| 146.09303 | GB (AMID) | 295.12946 | FE         | 440.19685 | MYGB (AMID) | 607.33168 | FERR          | 881.44166  | ERRMYGB (AMID)           |
| 148.06105 | E         | 304.16216 | ER         | 451.23057 | FERR        | 625.32450 | RRMY          | 901.43550  | FERRMY                   |
| 150.05895 | M         | 306.16006 | RM         | 460.26327 | ERR         | 682.34596 | RRMYG         | 958.45696  | FERRMYG                  |
| 162.07674 | T (ACET)  | 309.14515 | T (ACET) F | 462.26117 | RRM         | 738.37217 | FERRM         | 1028.51007 | FERRMYGB (AMID)          |
| 166.08687 | F         | 309.15636 | YGB (AMID) | 469.22339 | RMV         | 750.38996 | T (ACET) FERR | 1044.49378 | T (ACET) FERRMY          |
| 175.11957 | R         | 313.12228 | MY         | 526.24485 | RMVY        | 752.39907 | RRMYGB (AMID) | 1101.51524 | T (ACET) FERRMYG         |
| 175.11957 | R         | 331.22068 | RR         | 591.30376 | ERRM        | 754.36709 | ERRMY         | 1171.56835 | T (ACET) FERRMYGB (AMID) |



**Ac-Thr-Asp-Glu-Leu-Phe-Hyp-Val-Thr-Bla-NH<sub>2</sub> (8)**. From NovaGel™ (160 mg, 0.63 mmol g<sup>-1</sup>), **8** was obtained as colorless foamy solid after preparative HPLC purification (53 mg, 50%, as TFA-salt); anal. RP-HPLC (80% A, 20% D to 20% A, 80% D in 15 min): *t<sub>R</sub>* = 6.41 min; ESI MS(+): calcd for C<sub>47</sub>H<sub>72</sub>N<sub>10</sub>O<sub>17</sub>S: 1048.51, found: 1048.38.

Amino acid analysis of the bead corresponding to peptide **8**

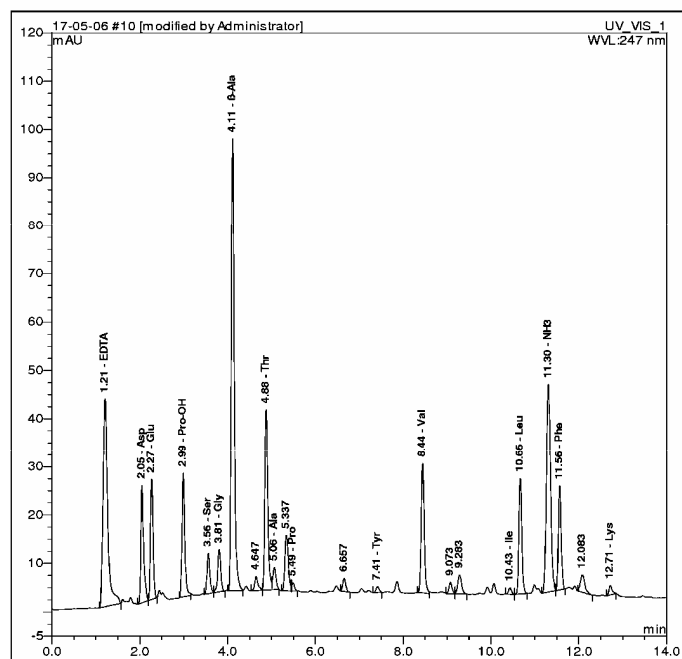

| RT min        | RT (STD) min | PW(50%) min | Area mAU*min  | Height mAU     | Amount pmol    | Peak Name |
|---------------|--------------|-------------|---------------|----------------|----------------|-----------|
| 1,21          | 1,22         | 0,103       | 5,28          | 43,00          | 453,2          | EDTA      |
| 2,05          | 2,08         | 0,062       | 1,78          | 24,22          | 99,1           | Asp       |
| 2,27          | 2,29         | 0,065       | 1,73          | 24,77          | 107,4          | Glu       |
| 2,99          | 3,00         | 0,067       | 1,92          | 25,53          | 94,9           | Pro-OH    |
| 3,56          | 3,57         | 0,069       | 0,63          | 8,30           | 38,9           | Ser       |
| 3,81          | 3,82         | 0,071       | 0,70          | 8,68           | 41,9           | Gly       |
| 4,11          | 4,12         | 0,072       | 7,51          | 93,70          | 455,6          | B-Ala     |
| 4,88          | 4,88         | 0,070       | 2,94          | 37,34          | 208,0          | Thr       |
| 5,06          | 5,06         | 0,081       | 0,38          | 4,52           | 21,0           | Ala       |
| 5,49          | 5,49         | n.a.        | 0,12          | 1,67           | 6,6            | Pro       |
| 7,41          | 7,40         | 0,078       | 0,10          | 1,16           | 5,3            | Tyr       |
| 8,44          | 8,43         | 0,072       | 2,15          | 26,73          | 118,4          | Val       |
| 10,43         | 10,42        | 0,069       | 0,10          | 1,32           | 5,9            | Ile       |
| 10,66         | 10,66        | 0,071       | 1,84          | 23,82          | 111,2          | Leu       |
| 11,30         | 11,30        | 0,100       | 4,65          | 43,03          | 435,5          | NH3       |
| 11,56         | 11,55        | 0,070       | 1,60          | 21,49          | 102,0          | Phe       |
| 12,71         | 12,70        | 0,073       | 0,16          | 1,91           | 5,1            | Lys       |
| <b>Total:</b> |              |             | <b>33,587</b> | <b>391,208</b> | <b>2310,21</b> |           |

ESI-MS(+) and analytical HPLC of peptide 8

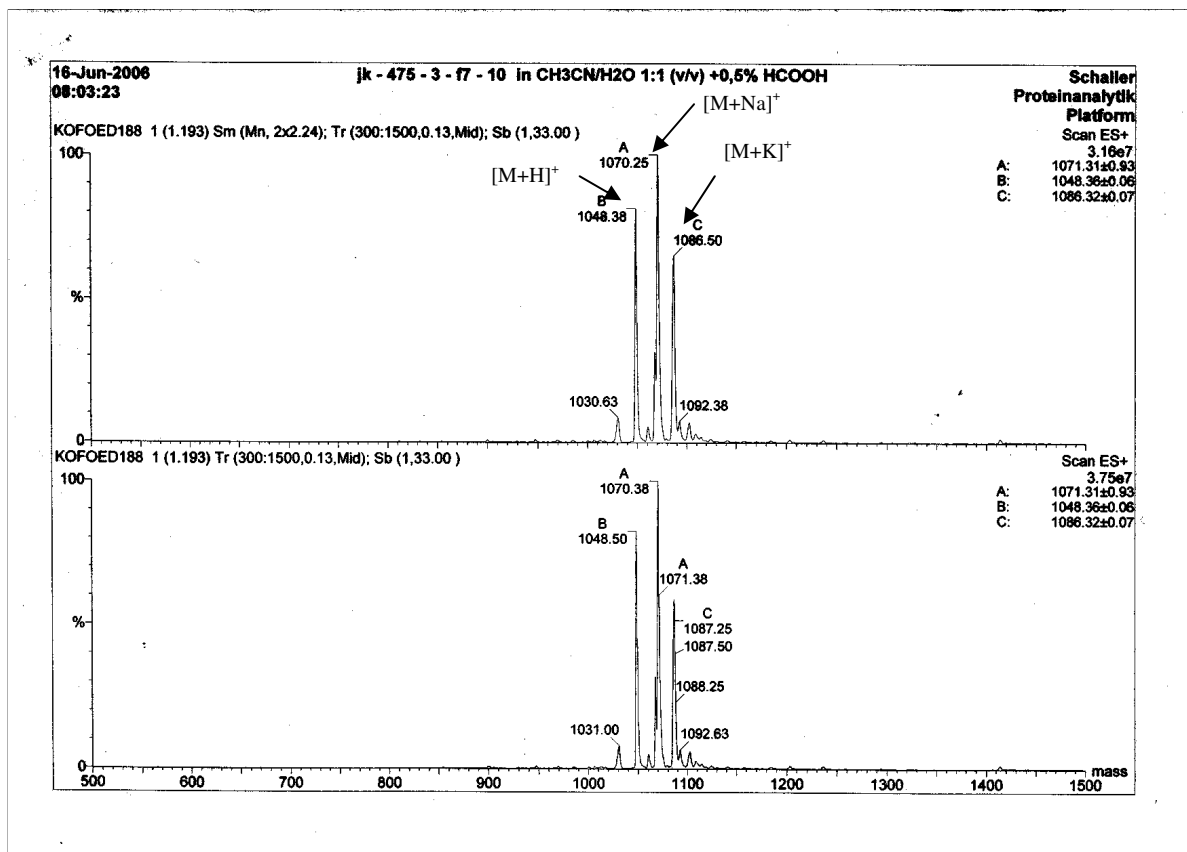

Empower

Default Individual Report

Reported by User: group reymond (hplc)

Project Name: kofaed

SAMPLE INFORMATION

|                   |               |                     |                          |
|-------------------|---------------|---------------------|--------------------------|
| Sample Name:      | jk-480-3-0min | Acquired By:        | hplc                     |
| Sample Type:      | Unknown       | Date Acquired:      | 14.07.2006 14:03:08 CEST |
| Vial:             | 1             | Acq. Method Set:    | HPLC1_1000_0100_in_15min |
| Injection #:      | 2             | Date Processed:     | 14.07.2006 14:45:56 CEST |
| Injection Volume: | 25.00 ul      | Processing Method:  | protease                 |
| Run Time:         | 22.0 Minutes  | Channel Name:       | 214.0nm                  |
| Sample Set Name:  |               | Proc. Chnl. Descr.: | PDA214.0 nm              |

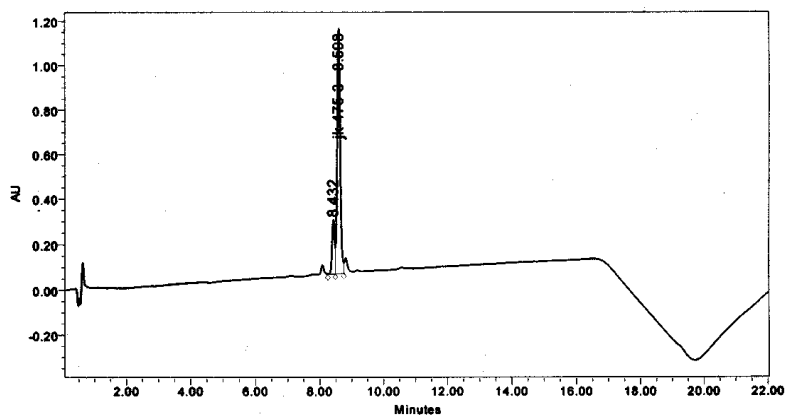

| Peak Name       | RT    | Area | % Area | Height |
|-----------------|-------|------|--------|--------|
| 1 jk-475-5      | 6.027 |      |        |        |
| 2 Peak3 214.0nm | 6.494 |      |        |        |

ESI MS(+) and HPLC of proteolytic digest of peptide 8 with Pepsin

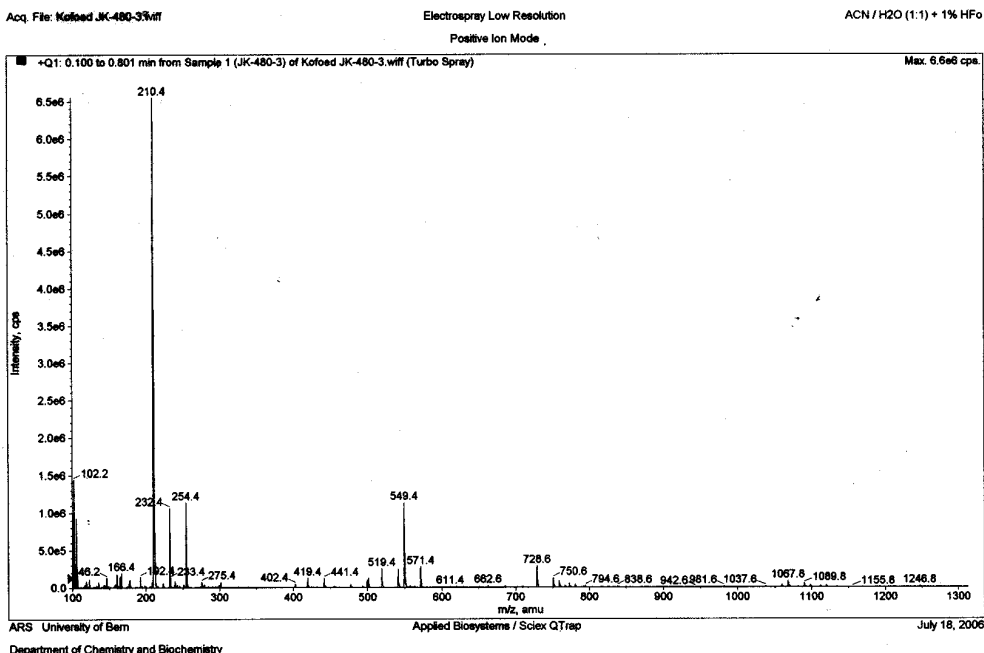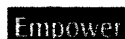

Default Individual Report

Reported by User: group reymond (hplc)

Project Name: kofeod

SAMPLE INFORMATION

|                   |                |                     |                          |
|-------------------|----------------|---------------------|--------------------------|
| Sample Name:      | jk-480-3-60min | Acquired By:        | hplc                     |
| Sample Type:      | Unknown        | Date Acquired:      | 14.07.2006 15:19:06 CEST |
| Vial:             | 1              | Acq. Method Set:    | HPLC1_1000_0100_in_15min |
| Injection #:      | 5              | Date Processed:     | 14.07.2006 15:50:01 CEST |
| Injection Volume: | 25.00 ul       | Processing Method:  | protease                 |
| Run Time:         | 22.0 Minutes   | Channel Name:       | 214.0nm                  |
| Sample Set Name:  |                | Proc. Chnl. Descr.: | PDA214.0 nm              |

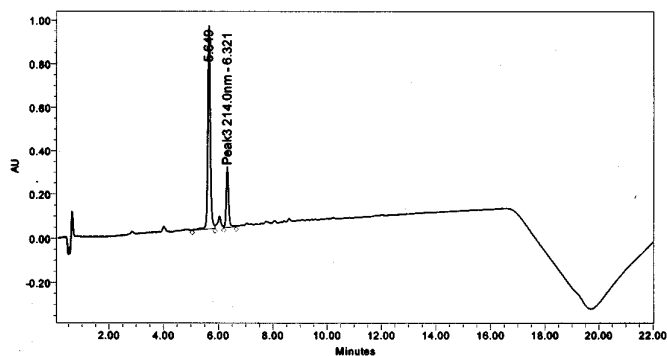

|   | Peak Name | RT    | Area    | % Area | Height |
|---|-----------|-------|---------|--------|--------|
| 1 |           | 5.649 | 5791808 | 77.99  | 927910 |
| 2 | JK-475-5  | 6.027 |         |        |        |

|                     |                      |                        |                          |                                     |
|---------------------|----------------------|------------------------|--------------------------|-------------------------------------|
| 89.07157 B (AMID)   | 219.13455 VT         | 378.20296 FXV          | 549.30375 FXVTB (AMID)   | 836.40423 DELFXVT                   |
| 118.08687 V         | 231.13455 XV         | 392.21861 LFX          | 592.33470 LFXVT          | 878.41483 T (ACET) DELFXV           |
| 120.06614 T         | 261.14511 EL         | 402.23534 XVTB (AMID)  | 620.32961 ELFXV          | 906.45734 DELFXVTB (AMID)           |
| 132.06614 X         | 263.08799 DE         | 406.14627 T (ACET) DE  | 636.28814 DELFX          | 979.46251 T (ACET) DELFXVT          |
| 132.10252 L         | 277.10368 T (ACET) D | 408.21352 ELF          | 662.38781 LFXVTB (AMID)  | 1049.51562 T (ACET) DELFXVTB (AMID) |
| 134.04540 D         | 279.13455 FX         | 479.25064 FXVT         | 666.29874 T (ACET) DELF  |                                     |
| 148.06105 E         | 279.17093 LF         | 491.28702 LFXV         | 721.37729 ELFXVT         |                                     |
| 162.07674 T (ACET)  | 289.18766 VTB (AMID) | 519.23033 T (ACET) DEL | 735.35655 DELFXV         |                                     |
| 166.08687 F         | 332.18223 XVT        | 521.26120 ELFX         | 779.34642 T (ACET) DELFX |                                     |
| 190.11925 TB (AMID) | 376.17205 DEL        | 523.24046 DELF         | 791.43040 ELFXVTB (AMID) |                                     |

**Ac-Pro-Val-Tyr-Ser-Arg-Hyp-Ala-Gly-Bla-NH<sub>2</sub> (9).** From NovaGel™ (160 mg, 0.63 mmol g<sup>-1</sup>), **9** was obtained as colorless foamy solid after preparative HPLC purification (59 mg, 53%, as TFA-salt); anal. RP-HPLC (100% A, 0% D to 0% A, 100% D in 15 min): *t<sub>R</sub>* = 5.79 min; ESI MS(+): calcd for C<sub>43</sub>H<sub>67</sub>N<sub>13</sub>O<sub>13</sub>: [M+H]<sup>+</sup> 974.5, found: 974.8.

Amino acid analysis of the bead corresponding to peptides **9** and **10**

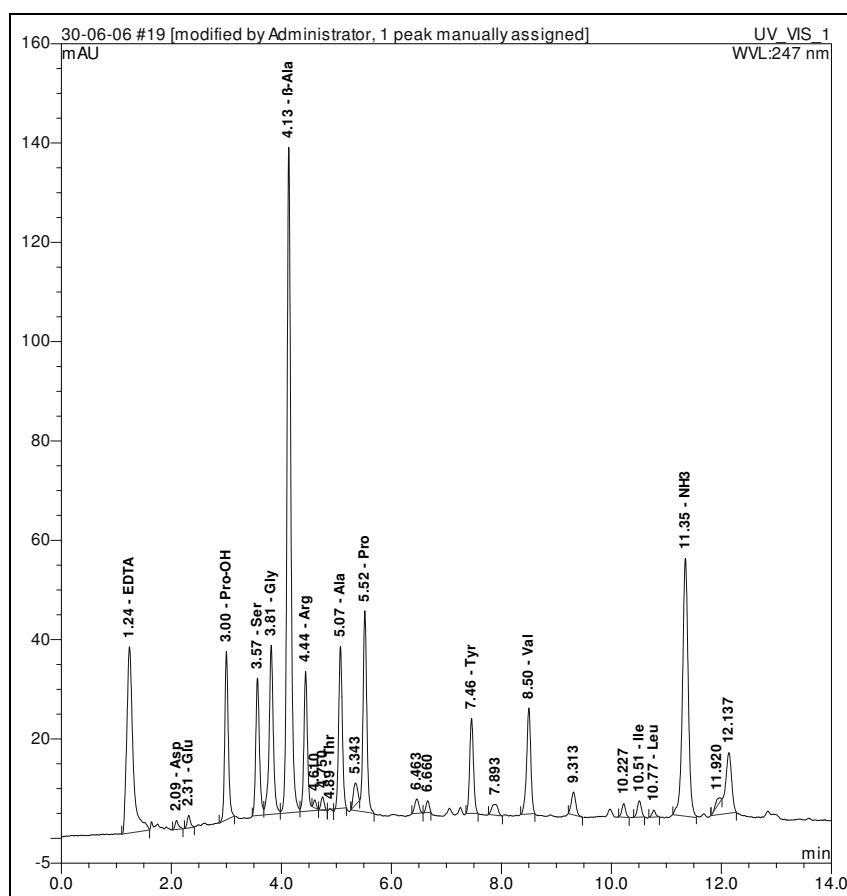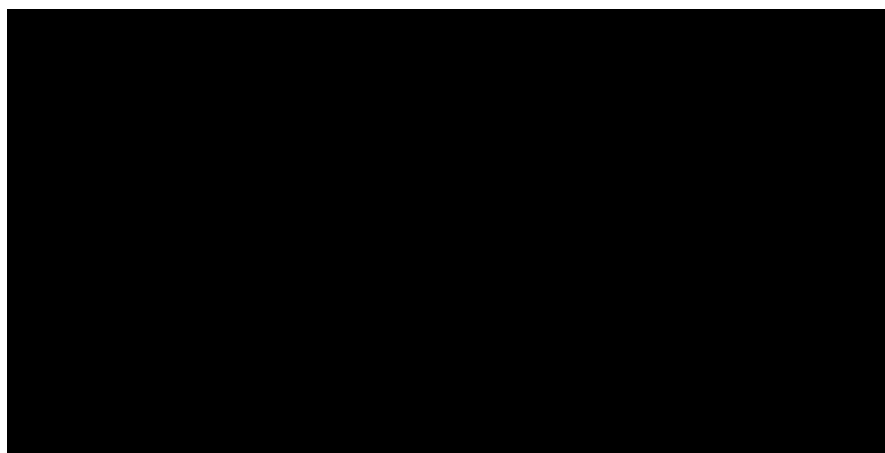

ESI-MS(+) and analytical HPLC of peptide 9

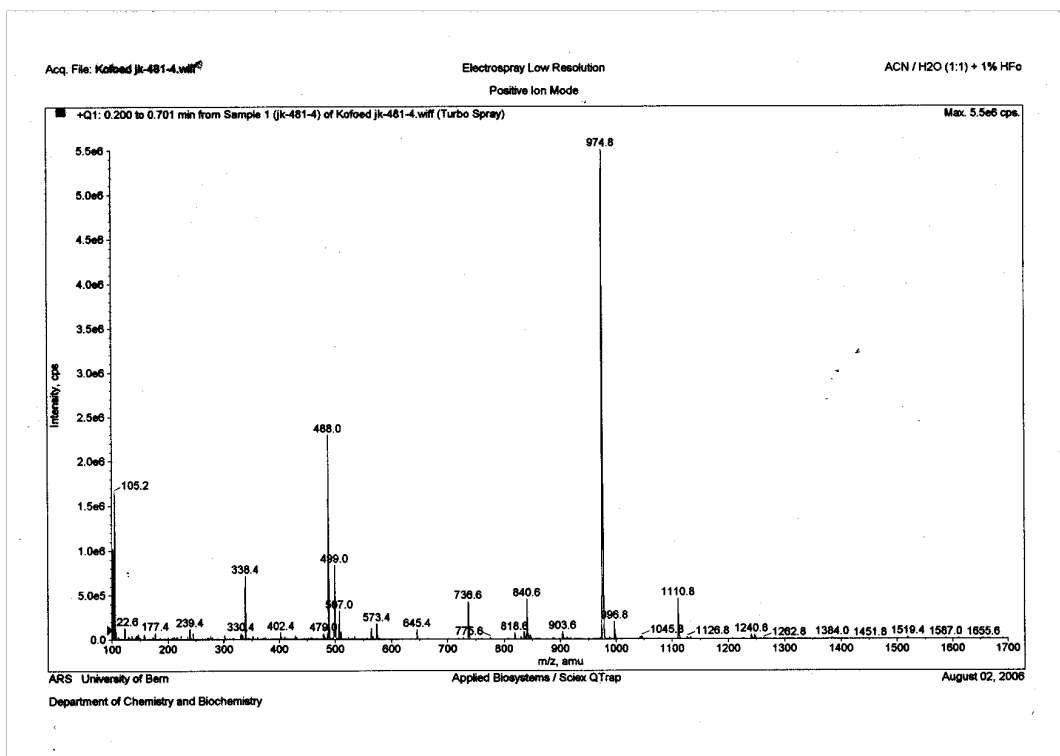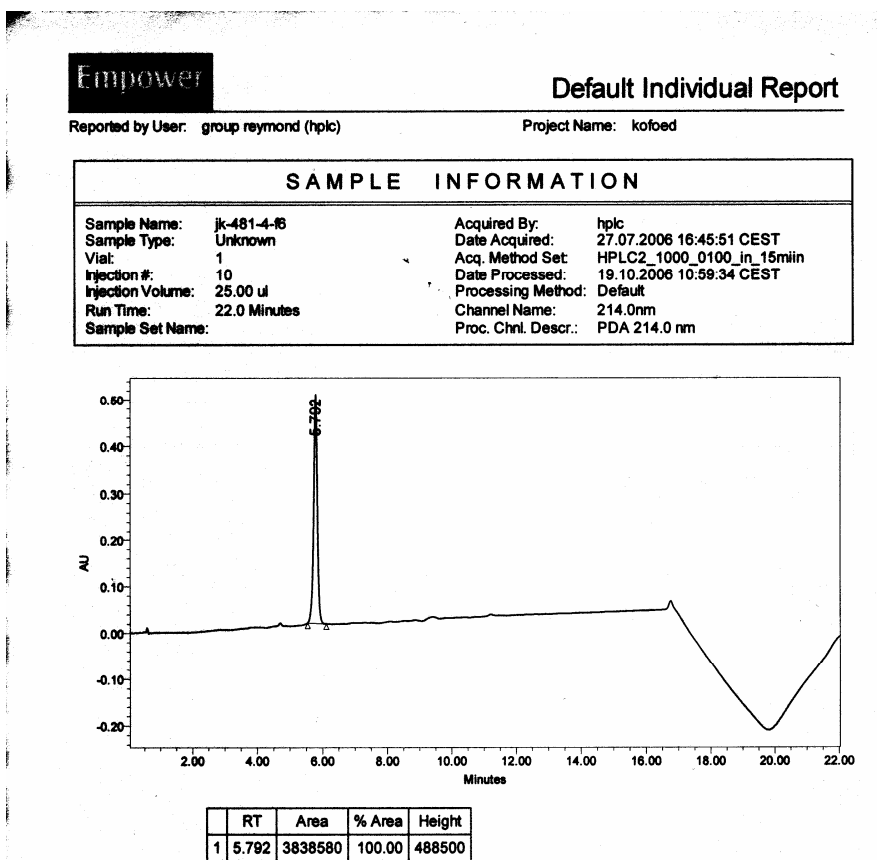

**Ac-Hyp-Val-Tyr-Arg-Pro-Ser-Ala-Gly-Bla-NH<sub>2</sub> (10).** From NovaGel™ (160 mg, 0.63 mmol g<sup>-1</sup>), **10** was obtained as colorless foamy solid after preparative HPLC purification (74 mg, 67%, as TFA-salt); anal. RP-HPLC (100% A, 0% D to 0% A, 100% D in 15 min): *t<sub>R</sub>* = 5.76 min; ESI MS(+): calcd for C<sub>43</sub>H<sub>67</sub>N<sub>13</sub>O<sub>13</sub>: [M+H]<sup>+</sup> 974.5, found: 974.8.

ESI-MS(+) and analytical HPLC of peptide **10**

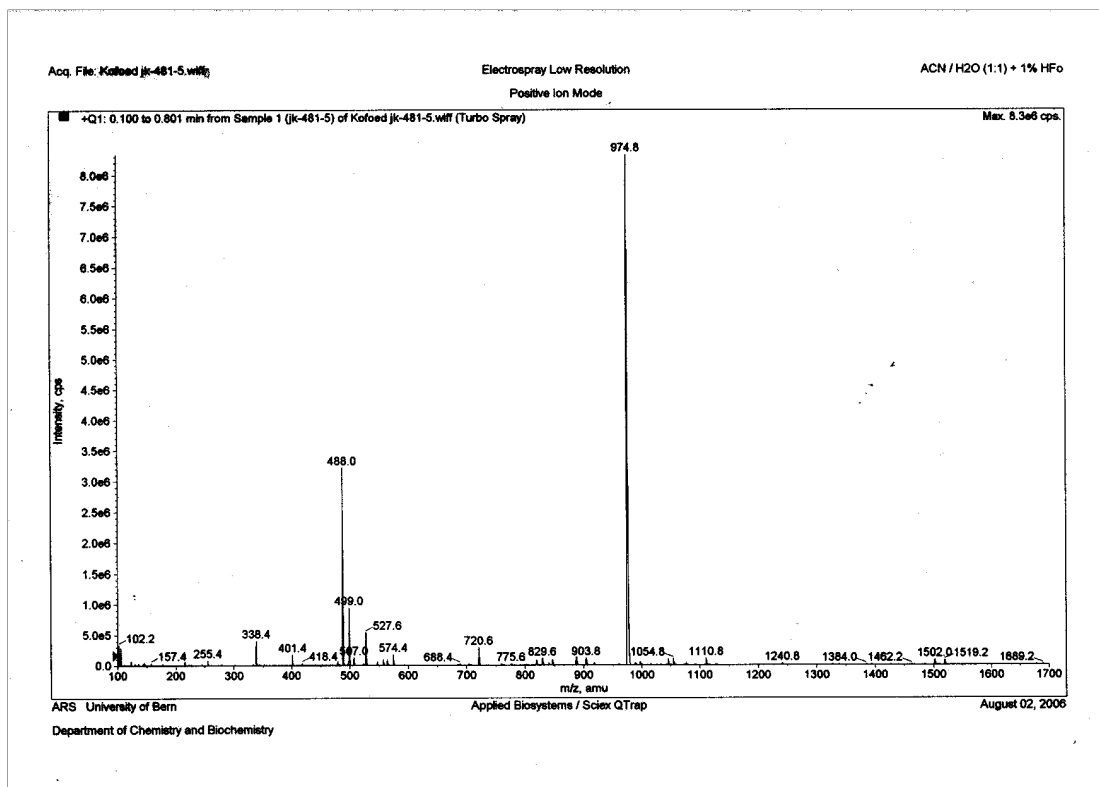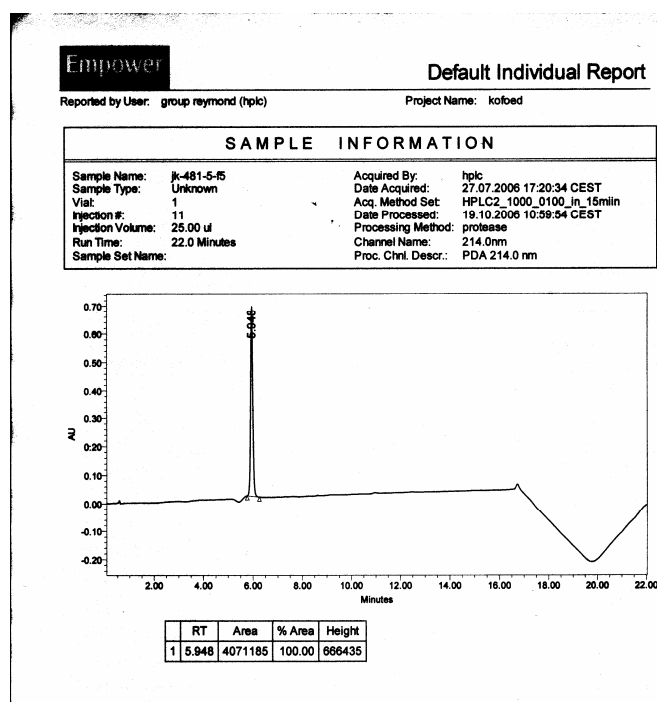

Supplement: b713595e.pdf [file b713595e.pdf]
